GGTTATCTTTCCCTGTTTACACGCCCCCTTCTATCGCAGTCGGGGGCGCTAGCCTCG  
 GTGCACCTTCGCCGCTAGCTCAGCAGACACAGTGCCTGGCTGTGCACCCGGGAATTTGC  
 AGCAGCTGTATATCTGACTGAGTCTCCCTGCCTGCTCCCGCGCCGATTTGGTGCCTGGA  
 GGGCTTCAGCGCGCCGACGCCCGCTTCTCCGAGCCGCCAGCGCCGCGGACTCGC  
 CCCGTGCCTCCAAAGCTGCTTCATCCAGAAAGAAAGAGAGAGTGCCTGGGGCCACCGGACCA  
 AGTGGAAAGGAGTTCGTGTGAAACCCCGCGAGCACACAGTTCATGGGGCCACCGGACCA  
 GCTGGGgtacycggggtggcggggaaagggtggtagctgaccgctcggcgatgacctttg  
 gggcgccagggtcccgcggggtgcgccagctccctgcggggtccctggcgctccagccccc  
 caactgtcgggctttggatcgggagggggcccccaatcagcgggtctaatctctgactggc  
 cgtgcggagggcgggaaagtgggtcactgcgcccgtcccgcggggcggggggcggggcggc  
 ggccgggggtcgcggggtctcgcgcggtgctcgtgccacgggctcccgctccggctcag  
 gccctgcgggtgcacacgggtcatcatccctctcccgaagggtgccctaacctctccctc  
 ggctctcactagctagccaaacctcgtttatttttagctcccccaccccccttggaacct  
 gggaaactcactgaggaggcgatctggcaggggggctctgggggggggggtctctaac  
 gcggaggtgcttctgtctattcccacatgggggcttggaggtcctctgggctgctttg  
 tgggtggggggtgccaggaggatggtattttccagggttgagggttttcagatgctcag  
 aggtggaggagtaaatggtcactgctgctgatggggtacatccctcaggcagggtgtttac  
 atgggactcagatgcttggaagaactctctcccttacctcaggggtgcaaggactt  
 aggtagtcagggggtgctgagggtaccgggtgaggtgaggtgactgacagctcttgcac  
 gacagtgccaaagctgggaattgaagcacaagggtctctgtgtgacataatttcagcat  
 atccacatcgattggacacagctctctcagaccccacccctgaggttaggggacctg  
 aaaggagctcaatgcagccctgtcctcaaggaaacccagacctgtggatggaaggat  
 caacgatggatgctgggctactcagaagcctccacagaggaaactgtctcttaggtaga  
 aagactggaggtcaggaggatggaaacagcagctgctccctcactggaggcttaggatag  
 gactctgagagatgatgctccagggaggggtcttaggagatctgtctctctctgactc  
 tggcacaagctcctgtgagttaaagggtgggggtgactgctggcattagcccctcattt  
 cagggggtcctctcaggcgagagagacagacagacagacagacagactcactgagctgtc  
 ctcaggcaacacacacacagatctgtacctgagctcctctgaggtgataagaatttggc  
 tgagagtgctcgcgagttaccaggtgcatccagatccttgtgctctgagacggctctaa  
 ctctgagttccgatcgggcaggaacagatgctgcctttcaggaccgtgcagggttgaga  
 agttggaatgcattagccagcaatgacagtggtcctattcttggagtgtcacaacaac  
 tacagtttaggtctctgtggcctccaaagggtcagactcactgtgcccaaggagggt  
 ctgggagtcaaggctggagctggacctgctgttccagctgttctcttagctccca  
 ggggaaggctctcaagatctctgtgctccttgccctacccccctacacagcttgaggagg  
 aaggaggagagagggggttggggagagatggggagctgctgactcactgctctctatcc  
 tagcctcactcctcctctcctcctcctcctcctcctcctcctcctcctcctcctcctcct  
 'CACCATGTTGGTAATGCTGCAGACCGTCTGTGACCATACCCCAAGTACCAGGATCGAC  
 TGGCCACACCAGgtgagggagagtagtlttccccctaccggctcactggaactcactgtg  
 ccttaaggctcacaaggaaactgactcttctccaggagttggagtggggagtctcttga  
 acttggcctccttccatgccctgcagccggaggctcagtgatttggagactggcagat  
 gccacagagatgctctctccaggaaggcagtttccagatcttggcccacacctgaccc  
 tgggtgtctctcatctctgctccttcccttctgtggtttctctcactctcttagtgaactc  
 ctgactctctctctgcttagcttagGCTTGATGATTGACCCAAAGACTGAGAACCCTTGA  
 TGTCAATGTCAACATTAGTGACACTGAAAGCTGGGGTCAGCATGTTCAAGACTCAACAA  
 GTTCTTGGAACTgagtggtgggctagtccaggacctgggggaaggaaatccaggacct  
 ggaagtggagcatttggcctctgacctctctctctctgctcccacctcctagCTTACAAC  
 GACTCCATCCAAGCAGAGAAGATGATGCTGCGCTCCAGGGGATATATGAGCAACT  
 GATAAAGGGTTGTAACACCCAAAGCTGCCTGCCAGTTCAACCGGACCCAACTGGGC  
 GATTGCTGTGGCAATTGGGACCCTACCCTACTAGGTTACAGCACCGGGCAGCCCTGTGTC  
 TTCATCAAAATGAATCGGGtccccatgatttgggtcctcccgggaggaggactggggcc  
 accatctgttactaatgtgtccttccatgggggttaaggccatcaaggagatttttgg  
 tagttgtttaaagggtggggctattggaagctaacccccagagctgaaaggctagagc  
 ccaagatggtgcaactcttctaaatccacctccctccttctctagTCACTCAACTTC  
 TATGCAGGGCAACCAGAGCATGAATGTCATGTTGTTGGCAAGgtgaggtggggggc  
 cctcttaccctgccacctggttagacctcctgggttctctgagtgcttaccacctctccc  
 atcttcttctgtctctcagaggccacagatagggaacagggggttaagagtgggcgccta  
 tgcagtttagctctaaagggtctctagccctattgctctctcttaggataaatgagagc  
 ctgctgtcctggagtagacctatccctctctgcaacaaagctctgaacctctggtctctt  
 cctctgcaacttttctctacatctcagttgtctgggttctctccactctccccctcagc  
 ctgtttctcagttccctcagctctgctagctactgctcagttagcaccctttgtctacaac  
 tagttgtccttggaaacctgcagccaaactctgctctctctagaaactctcctcctccca  
 ctgagccttgaactgttatctgtcttctctggctctgctccagagactgattcccaagg  
 accggggttaagaacttggggatgtagggtggggttagaggccctcaccgtgtgtgcaga  
 cccctagaaagacctagtctgaggagataggccacctctctgcagcatgcagatag  
 gaacatgtgtcatgcccacacacaaatgcacacacagctacctgagcagatgcacagct  
 caaagaaacaaagttagcagggtatattgggatgaggagggtacagaaggaggtctt  
 tgagcgtctccaggtgctgctgttctaaatccctctcctcttaacctctgcacccc  
 cacagAGAGATGAAGATGCTGAGAACCTTGGCCACTTTGTCAATGTTCCCTGCTAATGGC  
 AGCATGTACTGTACTTTCCCTACTATGGCAAAAAGTTCATgtaagtcccacctog  
 gaaggctccttgcgggtgctcctgaaatgaaaaatggtgctcttgggaaagagcgaagg  
 taccagagggttaactttttctctcctggccaggtAAACTATACTCAGCCTTTGGT  
 GGCTGAAAGTTCCTGAATGTGACCCCAACGTGGAGGTGAATGTTGAATGCCGATCAA  
 CGCTGCCAATATTGCCACAGAGATGAGCGGGACAAGTTCGCTGGCCGTGTCCTTCAA  
 ACTCCGGATCAACAAAACCTTGGCTCCCAACCCCAACCCCGCCCACTCTCTGTGGAT  
 GCTTCTGGAAATGCTTGCACCTGCCTGATCCCTCCCTCACCCACCCCAAAAGTATTTTT  
 TATAATAGAGCTATGACTGCTGAGCCTCAACCCCTTCTCAACTTCTTACTACTAGCC

TGATGCCACACAAATTTCCAACATCTTCCAACTTAGCTTAGCCAGAGACAGAGAGGAGT  
 CGGGAGTTTCTAGTTCGGGAACCGAGTTGCTACTCAGCAGACAGAGACTTGCCTAGCA  
 AGCAGAGGGCCCTCAGCATTGTTGGAGGTTTTCCTAGTTTAGTTTAAATGAGATGC  
 CTTACAGCTTCCTGTTTCTAGTTCCTACTCCCACTCCCTTAGAGGTTACAGGAAATGGTCTC  
 ATCCACCAGCCTTACCCCAAGATCCCTCGAACCGTTTCAGCCACTTTCCTTTCATCCTTCA  
 GGGTGAACACTGCTCTTCTTCTTACAGGTTCTAGCCACTTTCCTTTCATCCTTCA  
 CACTTCTGTCAACATAGCCAGTATCTTGGTGGCTTTGACTTCTGGTCTCTCCAGCAGTTC  
 TGCCCTCTCCTCTCCCTGATCCGTTGACCTGCAGGTCCGAC 5350

Figure 1. Nucleotide sequence of the mouse AMOG gene. Nucleotide residues are numbered in the 5' to 3' direction with the numbering beginning at the transcription initiation site of AMOG. Exons are indicated by capital letters. The putative promoter elements are underlined. The translation initiation site and the translation stop signal of AMOG and of the upstream open reading frame are indicated by boxes.
